# Supplementary material for: Facile fabrication of three-dimensional graphene microspheres using β-cyclodextrin aggregates as substrates and their application for midecamycin sensing
Source: Royal Society of Chemistry journal article supplement (doi:10.1039/c5ra11819k), 2015-01-01
Supplement: c5ra11819k1.pdf [file c5ra11819k1.pdf]

Electronic Supplementary Material (ESI) for RSC Advances

## Electronic Supplementary Information

### Facile Fabrication of Three-Dimensional Graphene Microspheres using $\beta$ -Cyclodextrin Aggregates as substrates and their Application for Midcamycin Sensing

Xiaofei Zhu<sup>a,b,†</sup>, Jingkun Xu<sup>a,†</sup>, Xuemin Duan<sup>a,\*</sup>, Limin Lu<sup>b,\*</sup>, Kaixin Zhang<sup>a</sup>, Yansha Gao<sup>a</sup>, Liqi Dong<sup>a</sup>, Hui Sun<sup>a</sup>

<sup>a</sup>School of Pharmacy, Jiangxi Science and Technology Normal University, Nanchang 330013, PR China.

<sup>b</sup>College of Science, Jiangxi Agricultural University, Nanchang 330045, PR China.

<sup>†</sup>These authors contributed equally to this work and should be considered co-first authors.

\*Corresponding author. E-mail: duanxuemin@126.com; lulimin816@hotmail.com. Tel.: +86 791 83802632;

Fax: +86 791 83805385

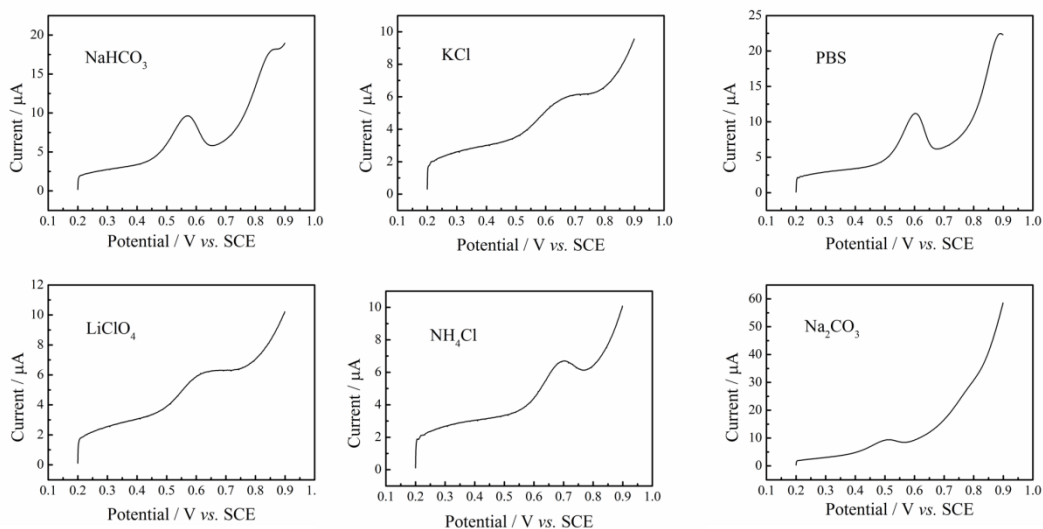

**Fig. S1** Linear sweep voltammograms of the 3D GR/ $\beta$ -CDAs-modified GCE in different buffer solutions (0.1 M) containing 10  $\mu$ M MD.

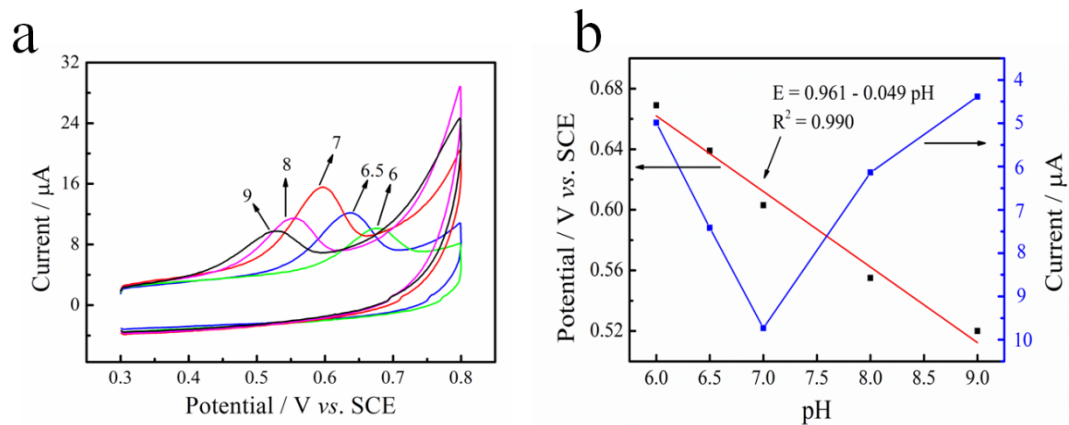

**Fig. S2** (a) Cyclic voltammograms of 3D GR/β-CDAs/GCE in PBS at different pH containing 20 μM MD. (b) Effect of pH on the anodic peak potentials and anodic peak currents of MD.
